# Supplementary material for: Initial shifts in nitrogen impact on ecosystem carbon fluxes in an alpine meadow: patterns and causes
Source: Copernicus journal article supplement (doi:10.5194/bg-2016-436), 2016-11-10
Supplement: Supplementary file 1 [file bg-2016-436-supplement.pdf]

# Initial shifts in nitrogen impact on ecosystem carbon fluxes in an alpine meadow: patterns and causes

Bing Song, Jian Sun, Qingping Zhou, Ning Zong, Shuli Niu

## Supplementary Material

**Figure S1.** N-induced accumulation of standing litter in high N addition plots (photos were taken on June 13).

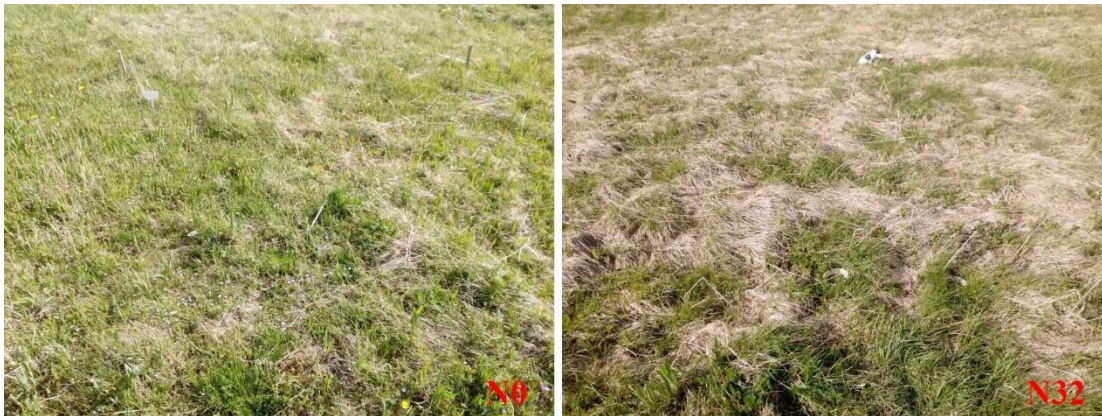

**Figure S1**
